# Supplementary material for: Highly pH-sensitive polyurethane exhibiting shape memory and drug release
Source: Royal Society of Chemistry journal article supplement (doi:10.1039/c4py00474d), 2014-01-01
Supplement: c4py00474d1.pdf [file c4py00474d1.pdf]

## Highly pH-Sensitive Polyurethane Exhibiting Shape Memory and Drug Release

Hongmei Chen, Ying Li, Ye Liu, Tao Gong, Lin Wang and Shaobing Zhou\*

### Support information:

FT- IR spectra of PEG4000-MDI-BIN is presented in **Figure S1**.

<sup>1</sup>H NMR of PEG4000-MDI-BIN is presented in **Figure S2**.

The DSC results of PEG4000-MDI-BIN are presented in **Figure S3**.

The effect of water on the hydrogen bond in polyurethane SMP is shown in **Figure S4**.

The effect of H<sup>+</sup> on the hydrogen bond in polyurethane SMP is shown in **Figure S5**.

A video of the shape fixity and recovery procedure video in acid and base is shown in **Movie S1**.

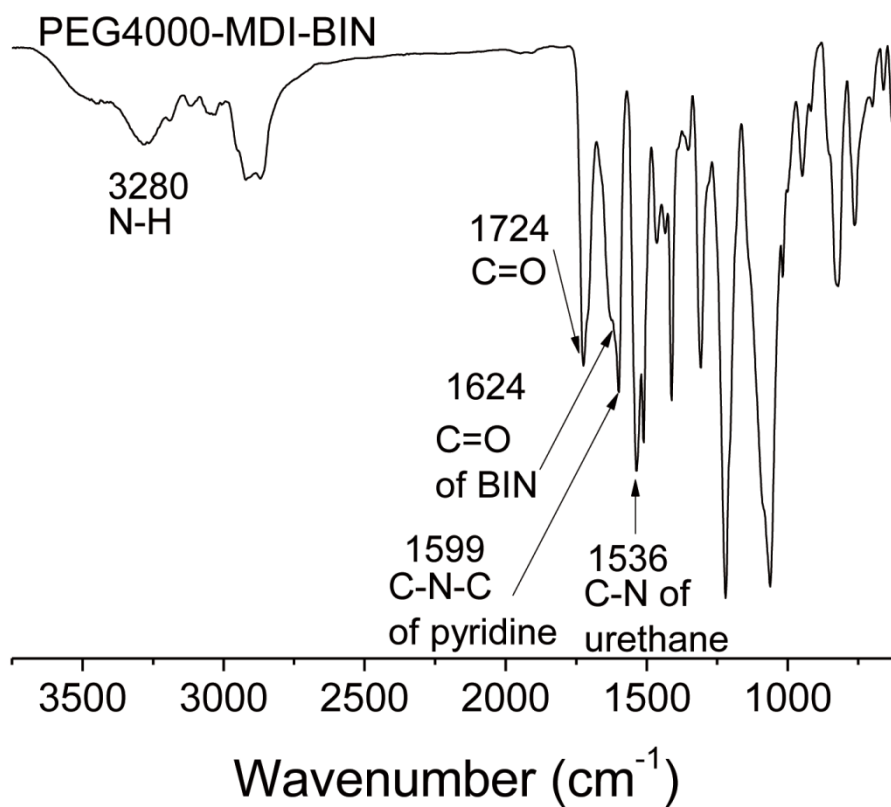

*Figure S1.* FT- IR spectraof PEG4000-MDI-BIN.

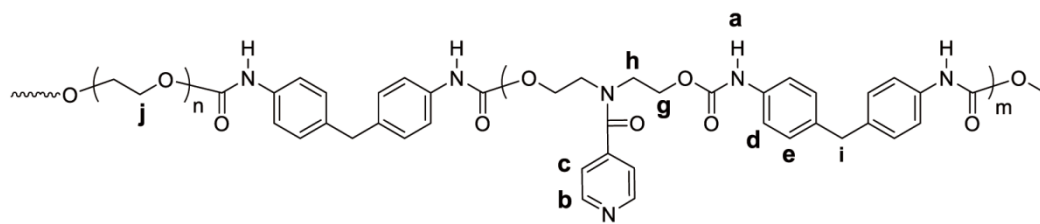

PEG4000-MDI-BIN

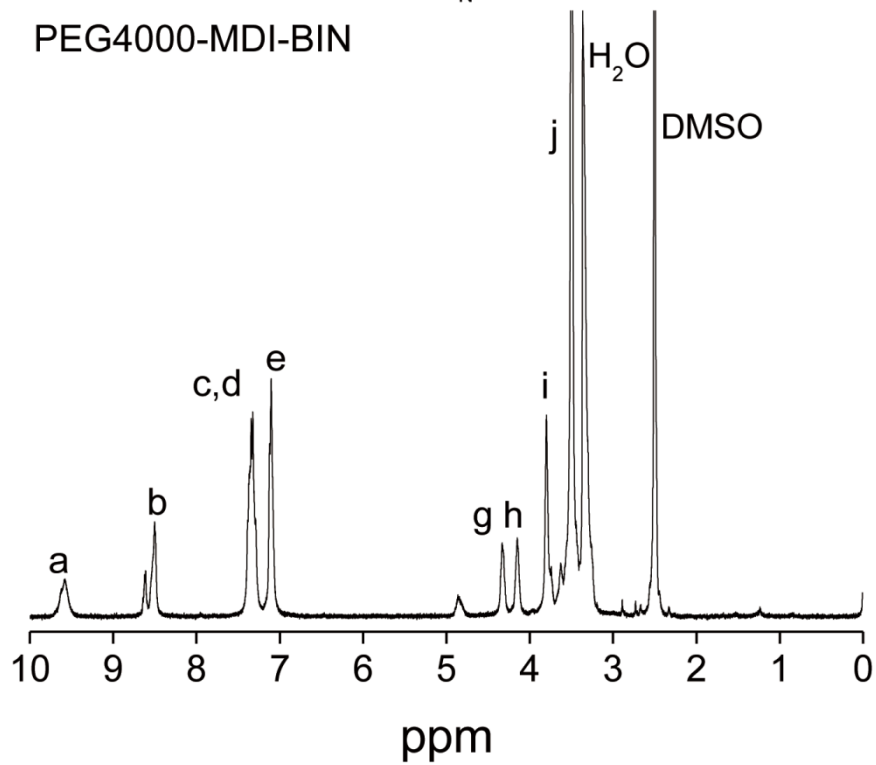

Figure S2. <sup>1</sup>H NMR of PEG4000-MDI-BIN.

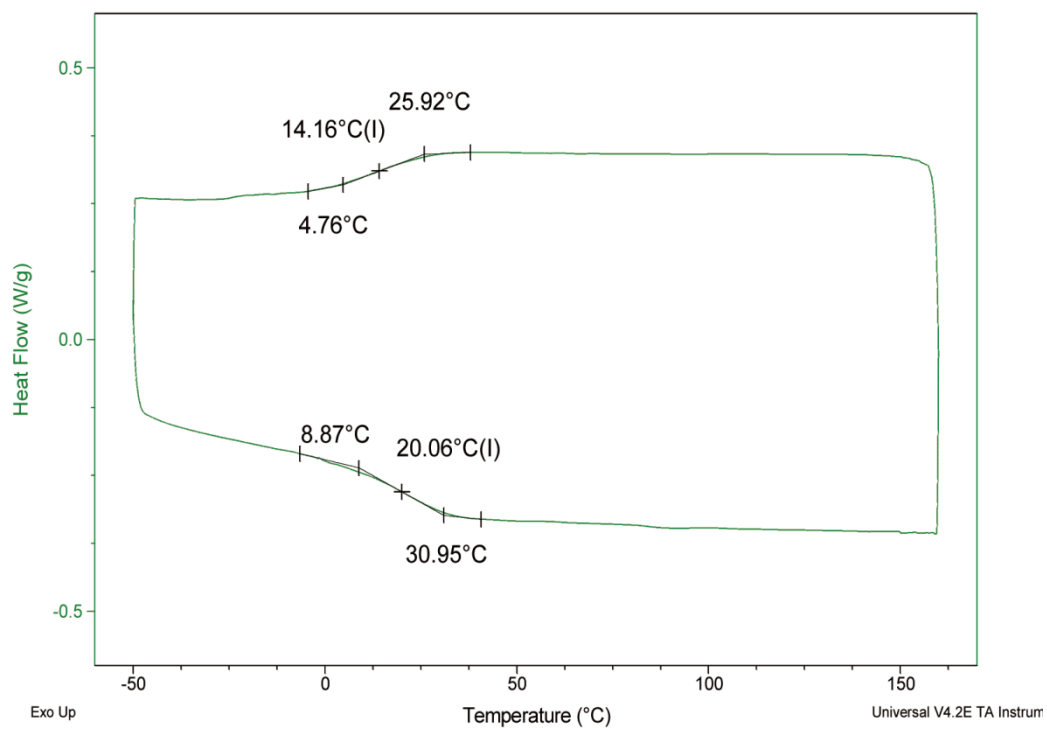

**Figure S3.** DSC results of PEG4000-MDI-BIN.

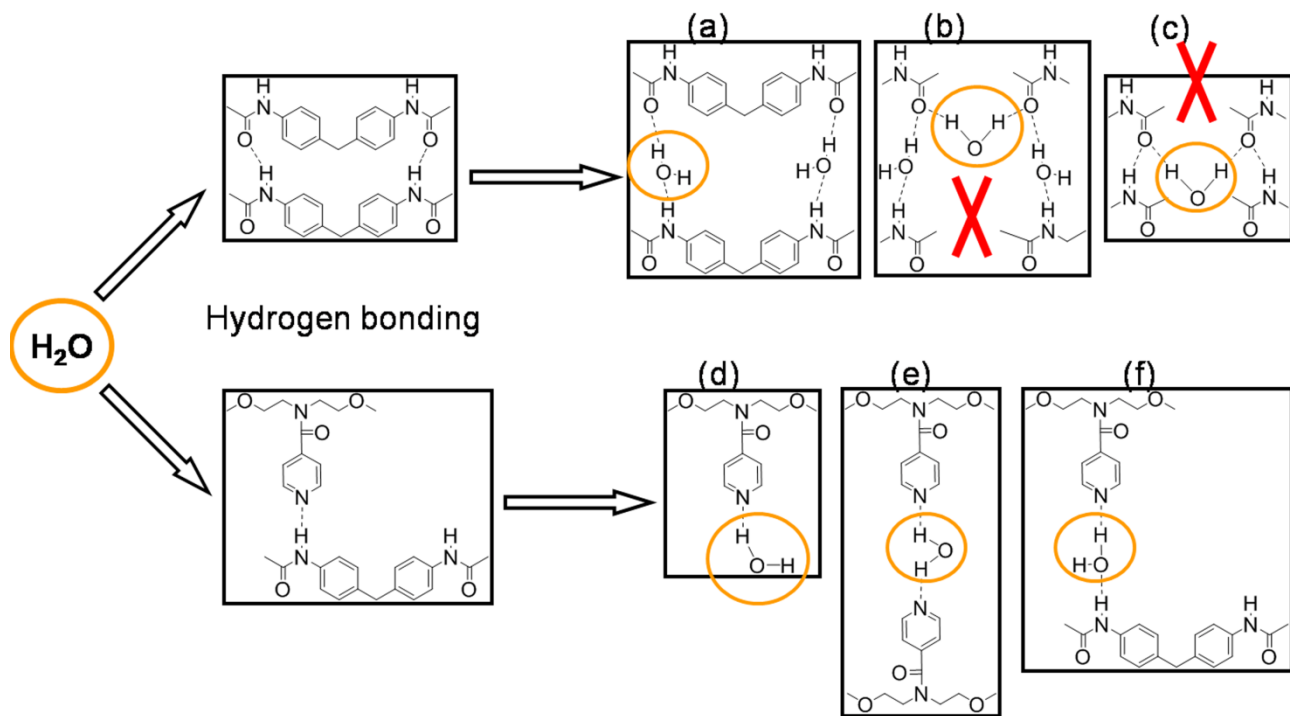

*Figure S4.* Effect of water on the hydrogen bond in polyurethane SMP.

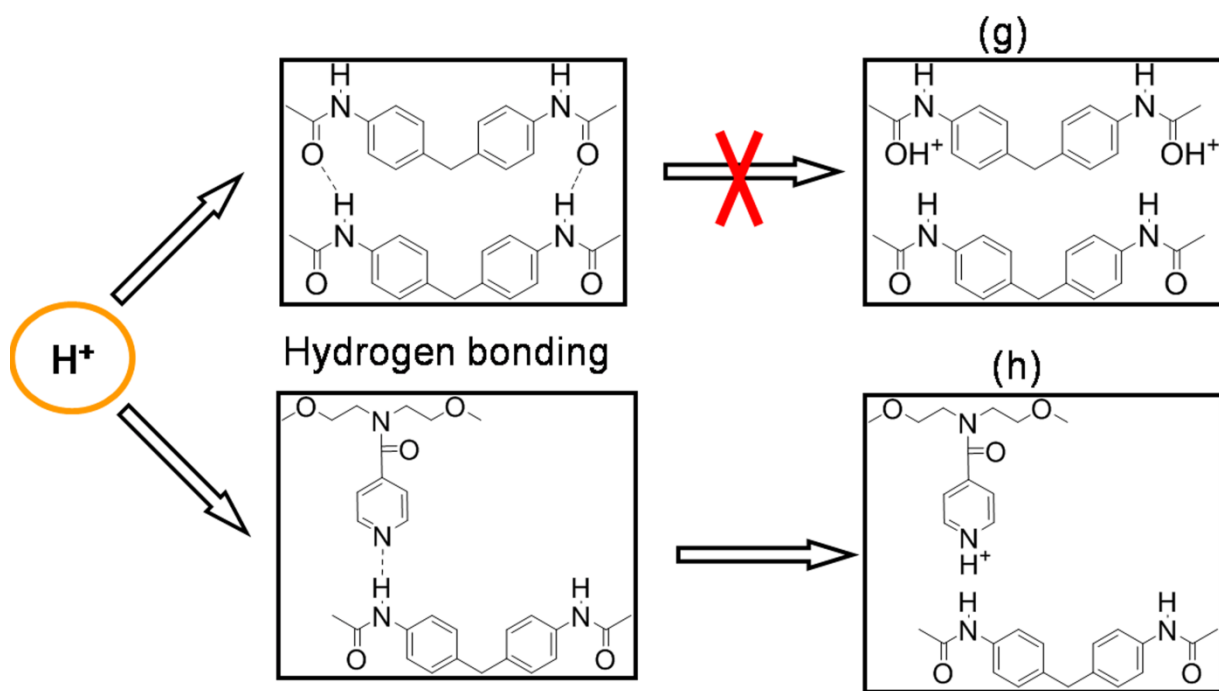

*Figure S5.* Effect of  $H^+$  on the hydrogen bond in polyurethane SMP.

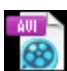

pH sensitive.avi

*Movie S1.* pH-induced shape memory recovery process.
